# Supplementary material for: Integrating Transcriptomics and Hormones Dynamics Reveal Seed Germination and Emergence Process in Polygonatum cyrtonema Hua
Source: MDPI journal article supplement (doi:10.3390/ijms24043792), 2023-02-14
Supplement: s1 [file s1]

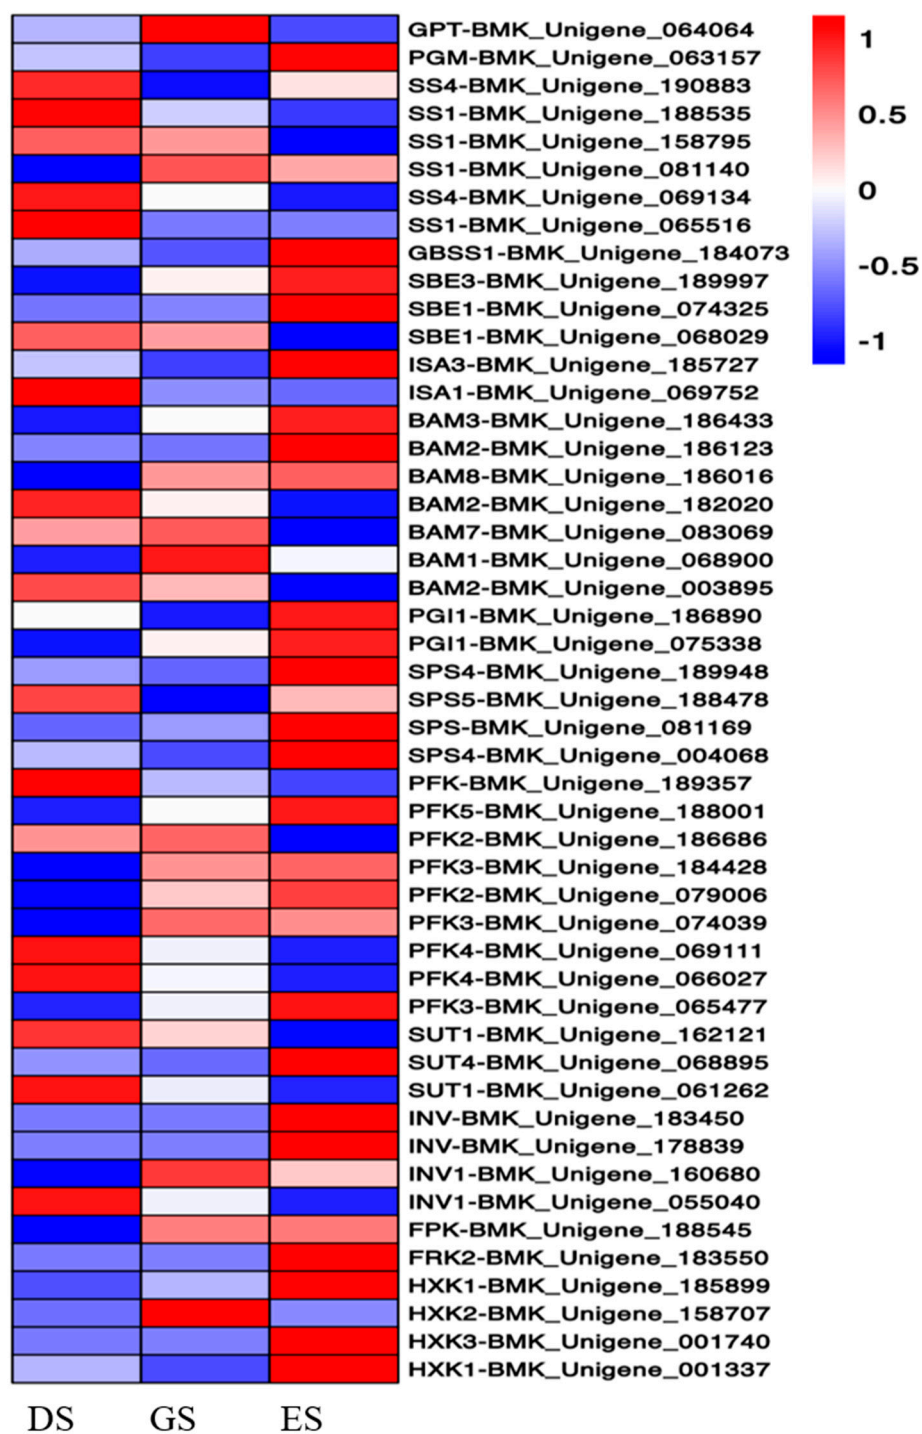

Figure S1: Heatmaps of DEGs involved in Carbohydrate metabolism pathways in *P. cyrtonema* Hua seeds during germination process.

Note: DS means non-germinating stage, GS phase means germination stage, and ES means emergence stage.
